# Supplementary material for: Polymorphs, ionic cocrystal and inclusion complex of N-amino-1,8-naphthalimide
Source: Royal Society of Chemistry journal article supplement (doi:10.1039/d2ce01673g), 2023-01-01
Supplement: d2ce01673g1.pdf [file d2ce01673g1.pdf]

## Supporting information

### Polymorphs, Ionic-Cocrystal and Inclusion Complex of N-Amino-1,8-Naphthalimide

Jagajiban Sendh, Jubaraj B. Baruah\*

#### Content List

---

|            |                                                                                                                                                                                                                                                                                                                                                                                                                                                                                                                                                                                                                                                                                                                                                                                                                                                                                                                                                                                                                                                                                                                                                                            |
|------------|----------------------------------------------------------------------------------------------------------------------------------------------------------------------------------------------------------------------------------------------------------------------------------------------------------------------------------------------------------------------------------------------------------------------------------------------------------------------------------------------------------------------------------------------------------------------------------------------------------------------------------------------------------------------------------------------------------------------------------------------------------------------------------------------------------------------------------------------------------------------------------------------------------------------------------------------------------------------------------------------------------------------------------------------------------------------------------------------------------------------------------------------------------------------------|
| Figure S1  | (a) ORTEP diagram of <b>L-1</b> (thermal ellipsoids drawn with 50% probability); (b) Stacking between the naphthalimide rings of <b>L-1</b> .                                                                                                                                                                                                                                                                                                                                                                                                                                                                                                                                                                                                                                                                                                                                                                                                                                                                                                                                                                                                                              |
| Figure S2  | Experimental (top) and simulated (bottom) PXRD patterns of <b>L-1</b> .                                                                                                                                                                                                                                                                                                                                                                                                                                                                                                                                                                                                                                                                                                                                                                                                                                                                                                                                                                                                                                                                                                    |
| Figure S3  | (a) ORTEP diagram of <b>L-2</b> (thermal ellipsoids drawn with 50% probability); (b) Stacking between the naphthalimide rings of <b>L-2</b> .                                                                                                                                                                                                                                                                                                                                                                                                                                                                                                                                                                                                                                                                                                                                                                                                                                                                                                                                                                                                                              |
| Figure S4  | PXRD patterns of <b>L-2</b> (top experimental, bottom simulated from CIF file).                                                                                                                                                                                                                                                                                                                                                                                                                                                                                                                                                                                                                                                                                                                                                                                                                                                                                                                                                                                                                                                                                            |
| Figure S5  | Isothermal calorimetric titration of compound <b>L</b> ( $5 \times 10^{-6}$ M) (a) with $\text{Zn}(\text{NO}_3)_2 \cdot 6\text{H}_2\text{O}$ ( $2.5 \times 10^{-4}$ M) (each time 2 $\mu\text{L}$ addition for 20 times) in milliQ water; and graph fitted to two sequential equilibrium $K_1 = (3.29 \pm 0.78) \times 10^3 \text{ M}^{-1}$ , $K_2 = (0.71 \pm 0.13) \times 10^3 \text{ M}^{-1}$ , with entropy change for the first equilibrium -439 cal/mol/deg, and -1.14 cal/mol/deg for second equilibrium. (b) Isothermal calorimetric titration of compound <b>L</b> (0.02 mM) with $\text{Cu}(\text{NO}_3)_2 \cdot 3\text{H}_2\text{O}$ (1mM) (each time 2 $\mu\text{L}$ addition for 20 times) in milliQ water; and graph was fitted to four sequential equilibrium $K_1 = (12.1 \pm 9.6) \times 10^5 \text{ M}^{-1}$ , $K_2 = (3.79 \pm 7.4) \times 10^4 \text{ M}^{-1}$ , $K_3 = (2.43 \pm 4.2) \times 10^6 \text{ M}^{-1}$ , $K_4 = (2.88 \pm 1.7) \times 10^3 \text{ M}^{-1}$ with entropy change for the first equilibrium 35.9 cal/mol/deg, second equilibrium -1.67 cal/mol/deg, third equilibrium 47.0 cal/mol/deg, fourth equilibrium -22.2 cal/mol/deg. |
| Figure S6  | (a) The structure of $[\text{HL}]\text{NO}_3 \cdot \text{H}_2\text{O}$ (thermal ellipsoids are with 50% probability), (b) stacking among the $\text{HL}^+$ ions (viewed along the c-axis).                                                                                                                                                                                                                                                                                                                                                                                                                                                                                                                                                                                                                                                                                                                                                                                                                                                                                                                                                                                 |
| Figure S7  | (a) Structure of $[\text{HL}]\text{NO}_3 \cdot \text{L} \cdot \text{H}_2\text{O}$ ionic co-crystal (thermal ellipsoids are with 50% probability) (b) Packing showing the $\pi$ -stacks among the cations and neutral <b>L</b> .                                                                                                                                                                                                                                                                                                                                                                                                                                                                                                                                                                                                                                                                                                                                                                                                                                                                                                                                            |
| Figure S8  | Packing of the $[\text{Cd}(\text{L})_3(\text{NO}_3)](\text{NO}_3) \cdot 2\text{L}$ showing the sandwiched <b>L</b> in the self-assembly. (thermal ellipsoids are with 50% probability).                                                                                                                                                                                                                                                                                                                                                                                                                                                                                                                                                                                                                                                                                                                                                                                                                                                                                                                                                                                    |
| Figure S9  | Powder-XRD patterns of the $[\text{Cd}(\text{L})_3(\text{NO}_3)](\text{NO}_3) \cdot 2\text{L}$ complex (top experimental, bottom simulated from CIF file).                                                                                                                                                                                                                                                                                                                                                                                                                                                                                                                                                                                                                                                                                                                                                                                                                                                                                                                                                                                                                 |
| Figure S10 | Powder-XRD patterns of the $[\text{CuL}_2(\text{NO}_3)_2]$ complex (top experimental, bottom simulated from CIF file).                                                                                                                                                                                                                                                                                                                                                                                                                                                                                                                                                                                                                                                                                                                                                                                                                                                                                                                                                                                                                                                     |
| Figure S11 | Room temperature X-band ESR spectrum of solid sample of the $[\text{CuL}_2(\text{NO}_3)_2]$ complex.                                                                                                                                                                                                                                                                                                                                                                                                                                                                                                                                                                                                                                                                                                                                                                                                                                                                                                                                                                                                                                                                       |
| Figure S12 | Asymmetric unit of the $[\text{CuL}_4](\text{NO}_3)_2$ complex (thermal ellipsoids are with 50% probability).                                                                                                                                                                                                                                                                                                                                                                                                                                                                                                                                                                                                                                                                                                                                                                                                                                                                                                                                                                                                                                                              |
| Figure S13 | Powder XRDs of $[\text{CuL}_4](\text{NO}_3)_2$ complex (top experimental, bottom simulated from CIF file).                                                                                                                                                                                                                                                                                                                                                                                                                                                                                                                                                                                                                                                                                                                                                                                                                                                                                                                                                                                                                                                                 |
| Figure S14 | Room temperature X-band ESR spectra of the $[\text{CuL}_4](\text{NO}_3)_2$ complex.                                                                                                                                                                                                                                                                                                                                                                                                                                                                                                                                                                                                                                                                                                                                                                                                                                                                                                                                                                                                                                                                                        |
| Figure S15 | Differential scanning calorimetry plots of the (i) $[\text{HL}]\text{NO}_3 \cdot \text{H}_2\text{O}$ salt; (ii) $[\text{HL}]\text{NO}_3 \cdot \text{L} \cdot \text{H}_2\text{O}$ ; (iii) $[\text{Cd}(\text{L})_3(\text{NO}_3)](\text{NO}_3) \cdot 2\text{L}$ complex; (iv) $[\text{CuL}_2(\text{NO}_3)_2]$ complex and (v) $[\text{CuL}_4](\text{NO}_3)_2$ complex. (Heating rate 10 $^\circ\text{C}/\text{min}$ under nitrogen atmosphere).                                                                                                                                                                                                                                                                                                                                                                                                                                                                                                                                                                                                                                                                                                                               |
| Figure S16 | Thermogram of the (a) $[\text{HL}]\text{NO}_3 \cdot \text{H}_2\text{O}$ co-crystal; (b) $[\text{CdL}_3(\text{NO}_3)](\text{NO}_3) \cdot 2\text{L}$ complex; (c) $[\text{CuL}_4](\text{NO}_3)_2$ and (d) $[\text{CuL}_2(\text{NO}_3)_2]$ complex (heating rate at 10 $^\circ\text{C}/\text{min}$ under nitrogen atmosphere).                                                                                                                                                                                                                                                                                                                                                                                                                                                                                                                                                                                                                                                                                                                                                                                                                                                |
| Figure S17 | SEM images of (i) <b>L-1</b> (ii) <b>L-2</b> (iii) $[\text{HL}]\text{NO}_3 \cdot \text{H}_2\text{O}$ ; (iv) $[\text{HL}]\text{NO}_3 \cdot \text{L} \cdot \text{H}_2\text{O}$ ; (v) $[\text{CdL}_3(\text{NO}_3)](\text{NO}_3) \cdot 2\text{L}$ complex.                                                                                                                                                                                                                                                                                                                                                                                                                                                                                                                                                                                                                                                                                                                                                                                                                                                                                                                     |
| Figure S18 | FT-IR spectra of the <b>L-1</b> (top) and <b>L-2</b> (bottom).                                                                                                                                                                                                                                                                                                                                                                                                                                                                                                                                                                                                                                                                                                                                                                                                                                                                                                                                                                                                                                                                                                             |
| Figure S19 | FT-IR spectra of the $[\text{CuL}_2(\text{NO}_3)_2]$ (top) and $[\text{CuL}_4](\text{NO}_3)_2$ (bottom) complex.                                                                                                                                                                                                                                                                                                                                                                                                                                                                                                                                                                                                                                                                                                                                                                                                                                                                                                                                                                                                                                                           |
| Figure S20 | FT-IR spectra of the compound <b>L</b> and the $[\text{CuL}_2(\text{NO}_3)_2]$ complex.                                                                                                                                                                                                                                                                                                                                                                                                                                                                                                                                                                                                                                                                                                                                                                                                                                                                                                                                                                                                                                                                                    |
| Figure S21 | FT-IR spectra of (a) $[\text{HL}]\text{NO}_3 \cdot \text{L} \cdot \text{H}_2\text{O}$ and (b) salt $[\text{HL}]\text{NO}_3 \cdot \text{H}_2\text{O}$ .                                                                                                                                                                                                                                                                                                                                                                                                                                                                                                                                                                                                                                                                                                                                                                                                                                                                                                                                                                                                                     |
| Figure S22 | FT-IR spectra of the compound <b>L</b> (top) and $[\text{CuL}_4](\text{NO}_3)_2$ (bottom) complex.                                                                                                                                                                                                                                                                                                                                                                                                                                                                                                                                                                                                                                                                                                                                                                                                                                                                                                                                                                                                                                                                         |

---

|            |                                                                                                                                                                                                                                                                                                                                                                                                                                                                                                                                                                                  |
|------------|----------------------------------------------------------------------------------------------------------------------------------------------------------------------------------------------------------------------------------------------------------------------------------------------------------------------------------------------------------------------------------------------------------------------------------------------------------------------------------------------------------------------------------------------------------------------------------|
| Figure S23 | : Experimental powder XRD patterns of the $[\text{CuL}_2(\text{NO}_3)_2]$ (top) and $[\text{CuL}_4](\text{NO}_3)_2$ (bottom) complex.                                                                                                                                                                                                                                                                                                                                                                                                                                            |
| Figure S24 | Zeta-potential plots of aqueous solution of (i) $[\text{HL}]\text{NO}_3 \cdot \text{H}_2\text{O}$ (1360 $\mu\text{M}$ ) salt; (ii) $[\text{HL}]\text{NO}_3 \cdot \text{L} \cdot \text{H}_2\text{O}$ (330 $\mu\text{M}$ ) ionic co-crystal; (iii) $[\text{CuL}_2(\text{NO}_3)_2]$ (540 $\mu\text{M}$ ) complex; (iv) $[\text{CuL}_4](\text{NO}_3)_2$ (225 $\mu\text{M}$ ) complex and (v) $[\text{CdL}_3(\text{NO}_3)](\text{NO}_3) \cdot 2\text{L}$ (257 $\mu\text{M}$ ) complex. (vi) L (1 mM aqueous solution). In each case 0.5 ml were taken for the respective measurement. |
| Figure S26 | The excitation and emission spectra of (a) L; (b) $[\text{LH}]\text{NO}_3 \cdot \text{H}_2\text{O}$ ; (c) $[\text{LH}]\text{NO}_3 \cdot \text{L} \cdot \text{H}_2\text{O}$ ; (d) $[\text{CdL}_3(\text{NO}_3)](\text{NO}_3) \cdot 2\text{L}$ (in each case 3ml solution of 10 mM conc. in methanol, $\lambda_{\text{exc}} = 380$ nm in each case).                                                                                                                                                                                                                                |
| Table 1S   | Hydrogen bond parameters of polymorph, ionic-crystal and metal complexes.                                                                                                                                                                                                                                                                                                                                                                                                                                                                                                        |

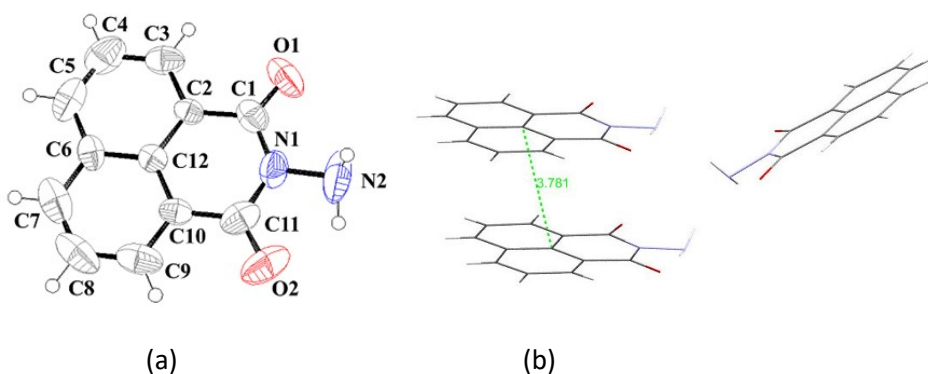

Figure S1: (a) ORTEP diagram of **L-1** (thermal ellipsoids drawn with 50% probability); (b) Stacking between the naphthalimide rings of **L-1**.

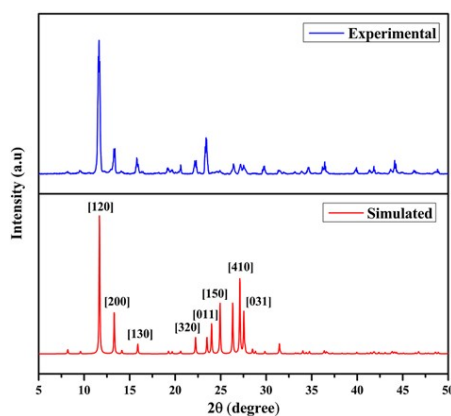

Figure S2: Experimental (top) and simulated (bottom) PXRD patterns of **L-1**.

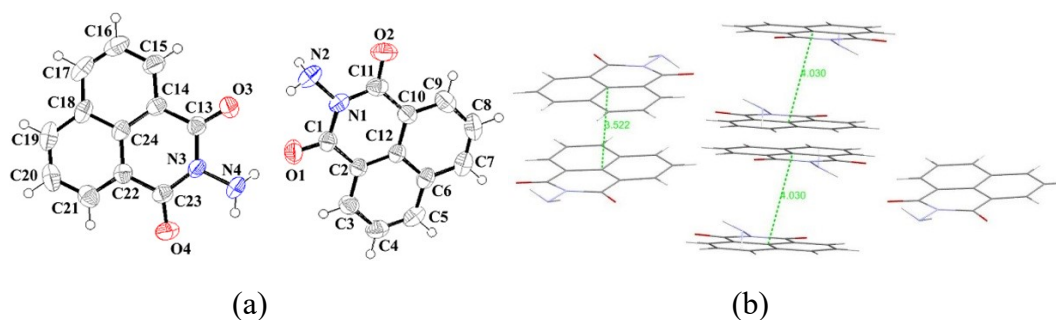

Figure S3: (a) ORTEP diagram of **L-2** (thermal ellipsoids drawn with 50% probability); (b) Stacking between the naphthalimide rings of **L-2**.

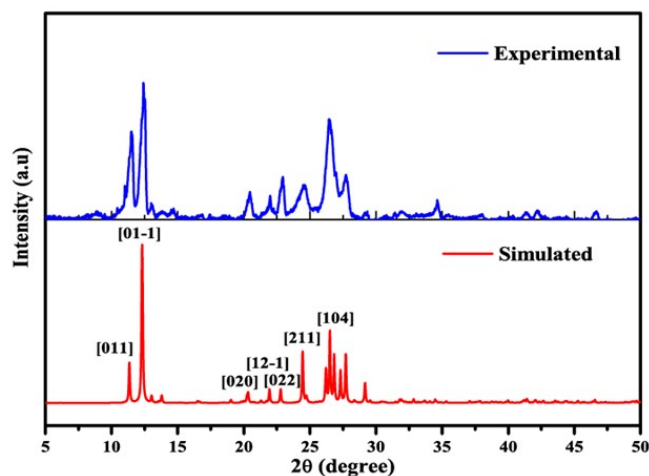

Figure S4: PXRD patterns of L-2 (top experimental, bottom simulated from CIF file).

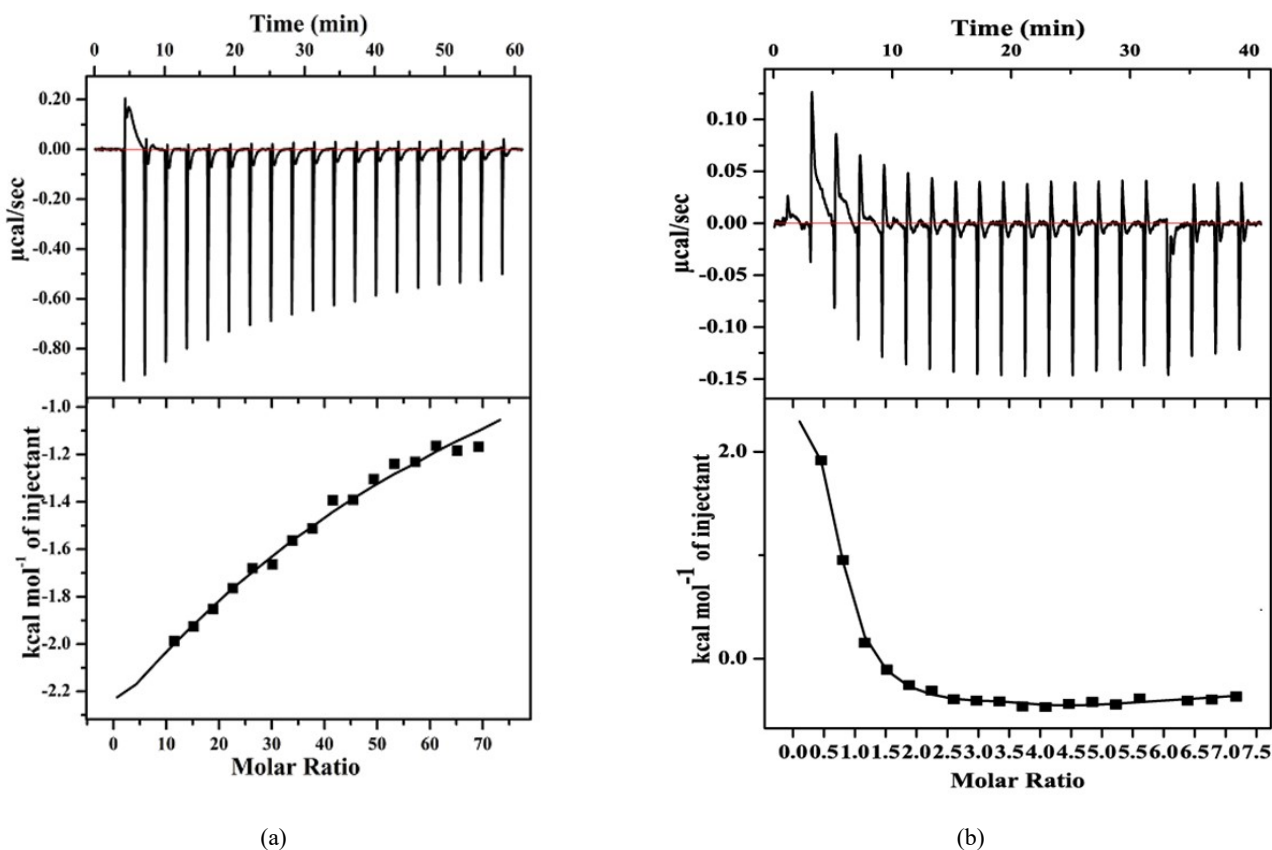

Figure S5: Isothermal calorimetric titration of compound L ( $5 \times 10^{-6}$  M) (a) with  $\text{Zn}(\text{NO}_3)_2 \cdot 6\text{H}_2\text{O}$  ( $2.5 \times 10^{-4}$  M) (each time  $2 \mu\text{L}$  addition for 20 times) in milliQ water; and graph fitted to two sequential equilibrium  $K_1 = (3.29 \pm 0.78) \times 10^3 \text{ M}^{-1}$ ,  $K_2 = (0.71 \pm 0.13) \times 10^3 \text{ M}^{-1}$ , with entropy change for the first equilibrium  $-439 \text{ cal/mol/deg}$ , and  $-1.14 \text{ cal/mol/deg}$  for second equilibrium. (b) Isothermal calorimetric titration of compound L ( $0.02 \text{ mM}$ ) with  $\text{Cu}(\text{NO}_3)_2 \cdot 3\text{H}_2\text{O}$  ( $1\text{mM}$ ) (each time  $2 \mu\text{L}$  addition for 20 times) in milliQ water; and graph was fitted to four sequential equilibrium  $K_1 = (12.1 \pm 9.6) \times 10^5 \text{ M}^{-1}$ ,  $K_2 = (3.79 \pm 7.4) \times 10^4 \text{ M}^{-1}$ ,  $K_3 = (2.43 \pm 4.2) \times 10^6 \text{ M}^{-1}$ ,  $K_4 = (2.88 \pm 1.7) \times 10^3 \text{ M}^{-1}$  with entropy change for the first equilibrium  $35.9 \text{ cal/mol/deg}$ , second equilibrium  $-1.67 \text{ cal/mol/deg}$ , third equilibrium  $47.0 \text{ cal/mol/deg}$ , fourth equilibrium  $-22.2 \text{ cal/mol/deg}$ .

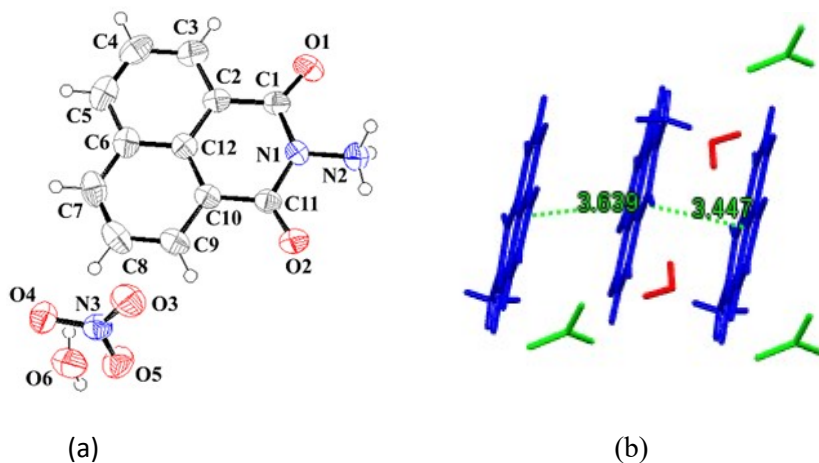

Figure S6: (a) The structure of  $[\text{HL}]\text{NO}_3 \cdot \text{H}_2\text{O}$  (thermal ellipsoids are with 50% probability), (b) stacking among the  $\text{HL}^+$  ions (viewed along the  $c$ -axis).

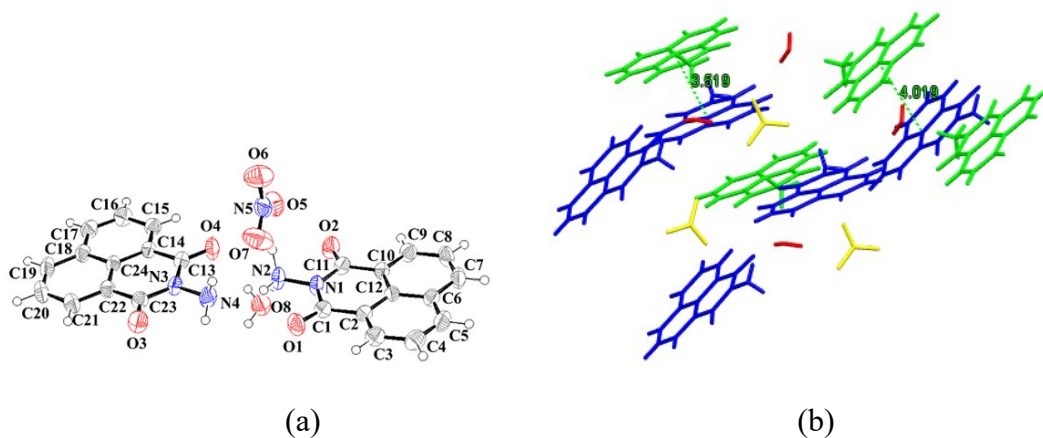

Figure S7: (a) Structure of the  $[\text{HL}]\text{NO}_3 \cdot \text{L} \cdot \text{H}_2\text{O}$  ionic co-crystal (thermal ellipsoids are with 50% probability) (b) Packing showing the  $\pi$ -stacks among the cations and neutral L.

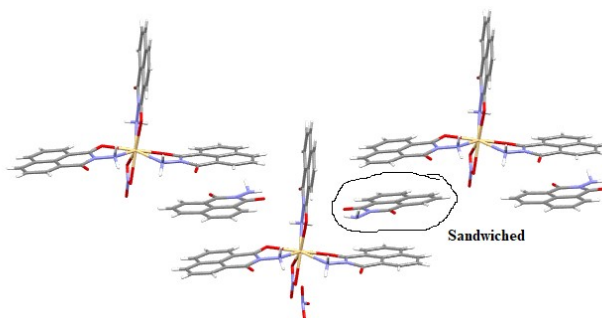

Figure S8: Packing of the  $[\text{Cd}(\text{L})_3(\text{NO}_3)](\text{NO}_3) \cdot 2\text{L}$  showing the sandwiched L in the self-assembly. (thermal ellipsoids are with 50% probability).

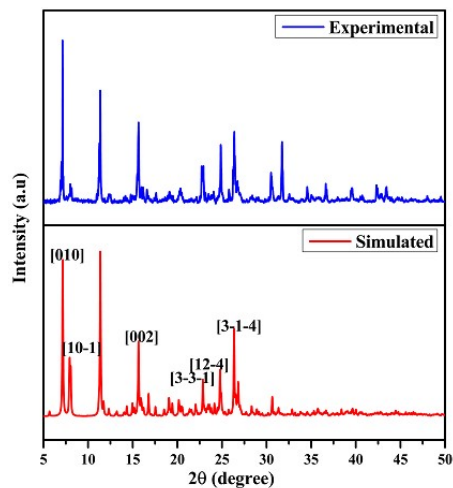

Figure S9: Powder-XRD patterns of the  $[\text{Cd}(\text{L})_3(\text{NO}_3)] \text{L}_2(\text{NO}_3)$  complex (top experimental, bottom simulated from CIF file).

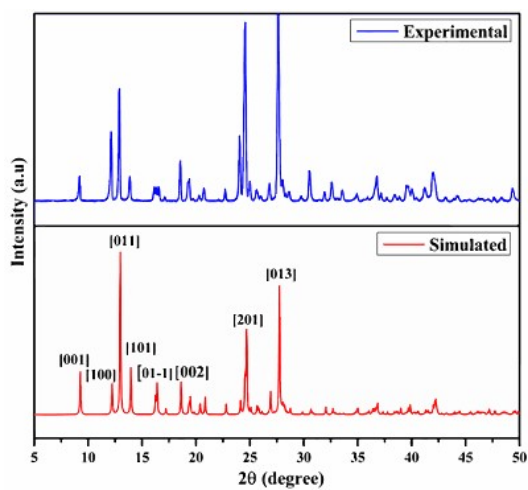

Figure S10: Powder-XRD patterns of the  $[\text{CuL}_2(\text{NO}_3)_2]$  complex (top experimental, bottom simulated from CIF file).

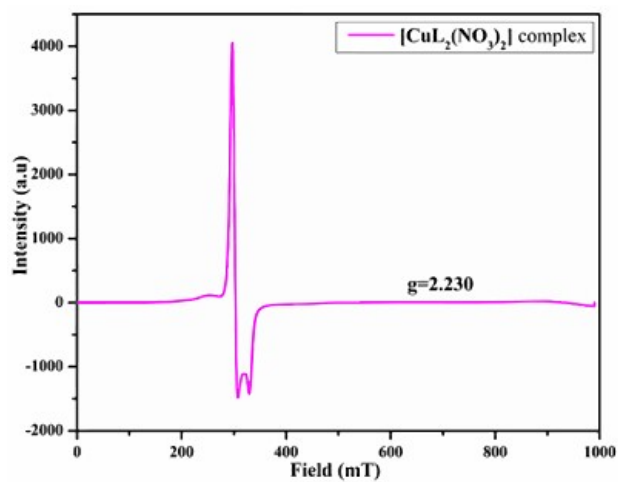

Figure S11: Room temperature X-band ESR spectrum of solid sample of the  $[\text{CuL}_2(\text{NO}_3)_2]$  complex.

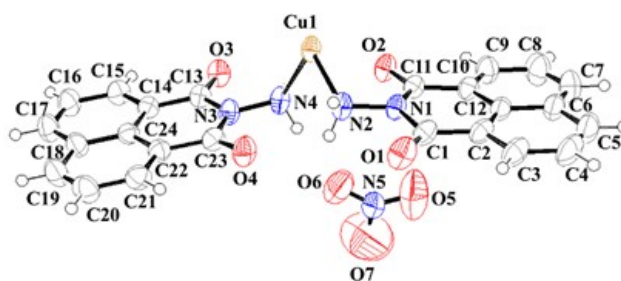

Figure S12: Asymmetric unit of the  $[\text{CuL}_4](\text{NO}_3)_2$  complex (thermal ellipsoids are with 50% probability).

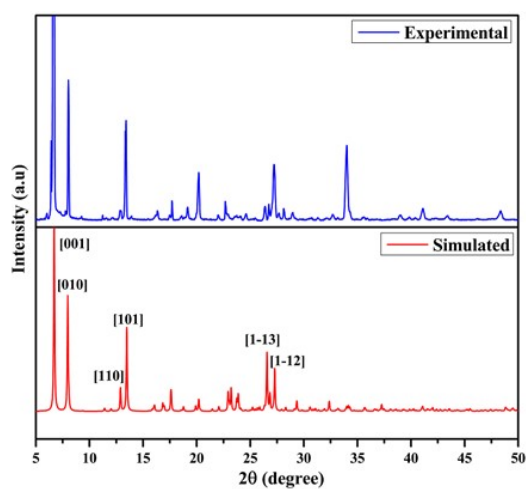

Figure S13: Powder XRDs of  $[\text{CuL}_4](\text{NO}_3)_2$  complex (top experimental, bottom simulated from CIF file).

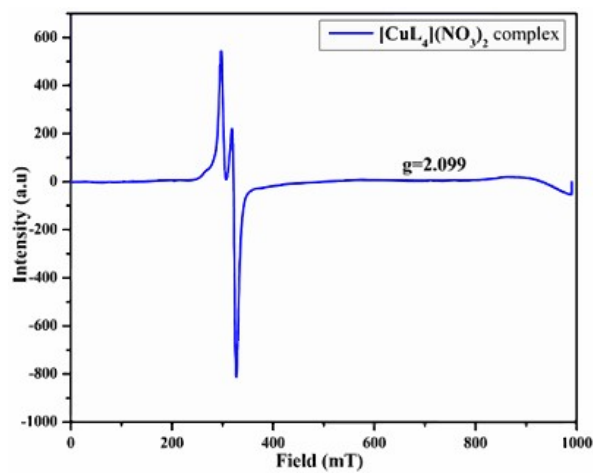

Figure S14: Room temperature X-band ESR spectra of the  $[\text{CuL}_4](\text{NO}_3)_2$  complex.

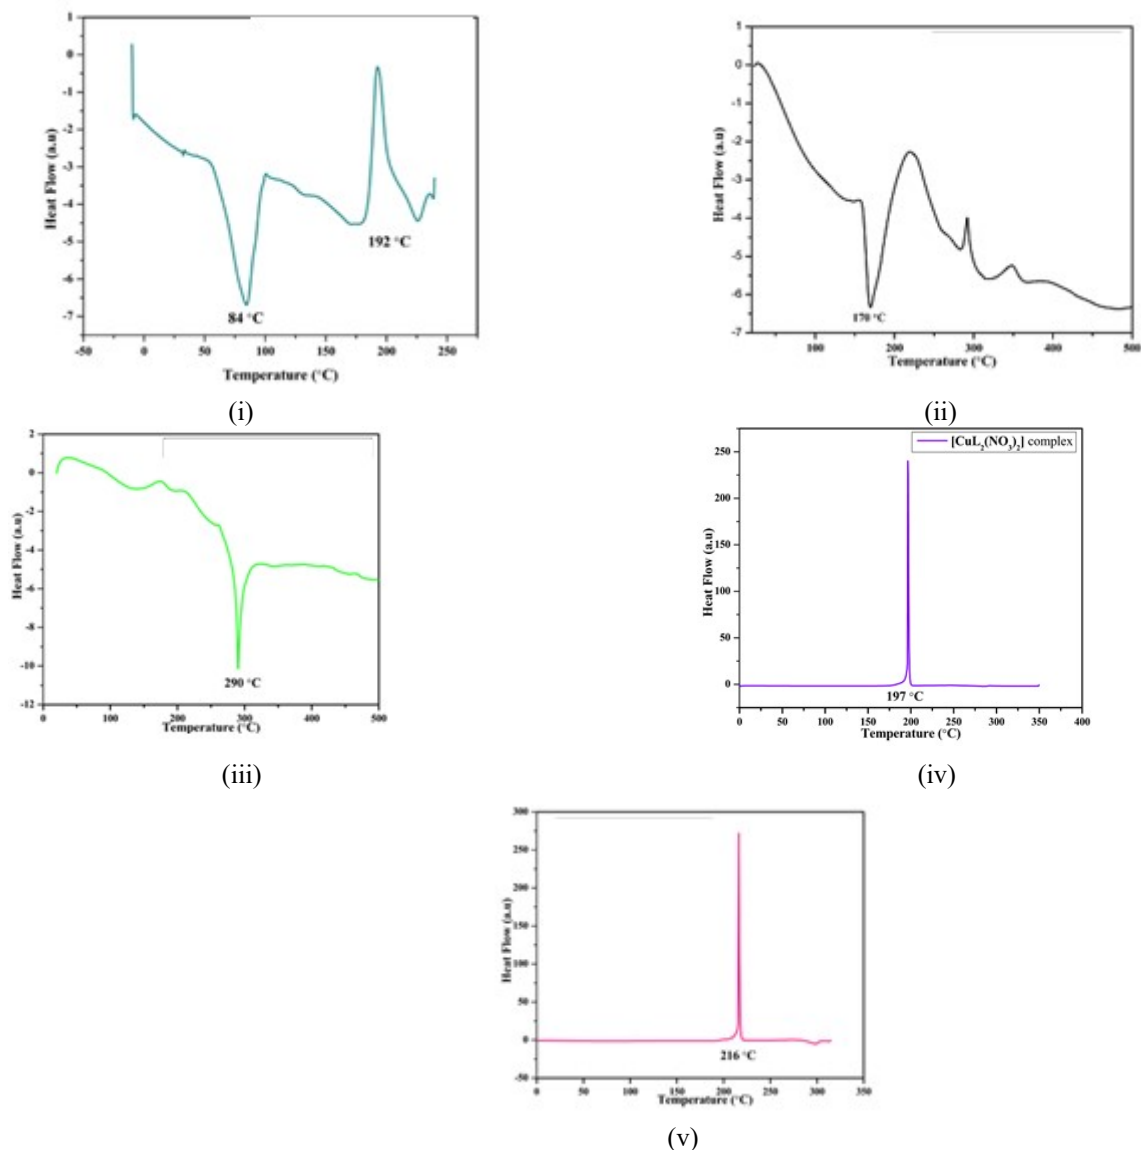

Figure S15: Differential scanning calorimetry plots of the (i)  $[\text{HL}]\text{NO}_3 \cdot \text{H}_2\text{O}$  salt; (ii)  $[\text{HL}]\text{NO}_3 \cdot \text{L} \cdot \text{H}_2\text{O}$ ; (iii)  $[\text{Cd}(\text{L})_3(\text{NO}_3)](\text{NO}_3)_2\text{L}$  complex; (iv)  $[\text{CuL}_2(\text{NO}_3)_2]$  complex and (v)  $[\text{CuL}_4](\text{NO}_3)_2$  complex. (Heating rate  $10^\circ\text{C}/\text{min}$  under nitrogen atmosphere.)

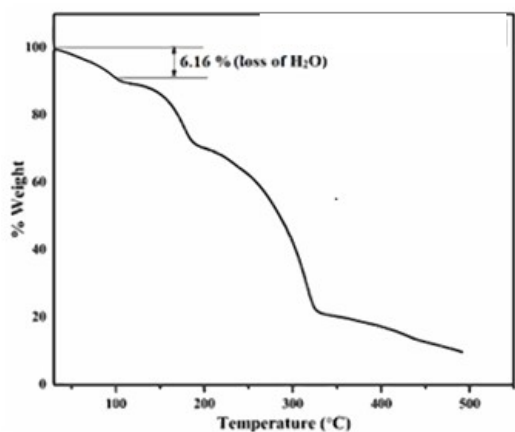

(i)

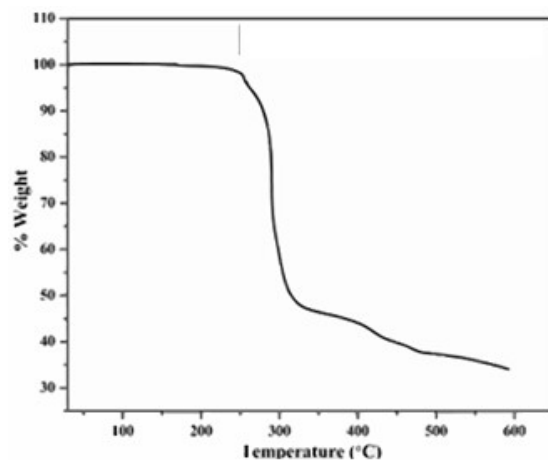

(ii)

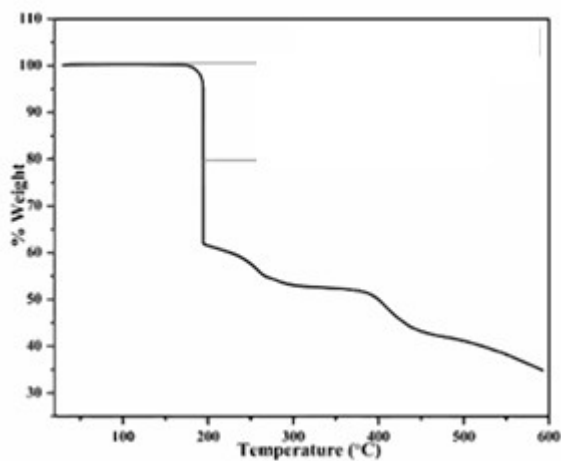

(iii)

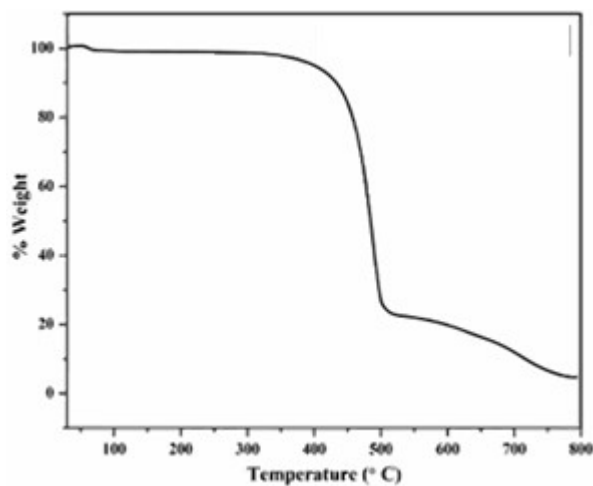

(iv)

Figure S16: Thermogram of the (a)  $[\text{HL}]\text{NO}_3 \cdot \text{H}_2\text{O}$  co-crystal; (b)  $[\text{CdL}_3(\text{NO}_3)](\text{NO}_3) \cdot 2\text{L}$  complex; (c)  $[\text{CuL}_4](\text{NO}_3)_2$  and (d)  $[\text{CuL}_2(\text{NO}_3)_2]$  complex (heating rate at  $10^\circ\text{C}/\text{min}$  under nitrogen atmosphere).



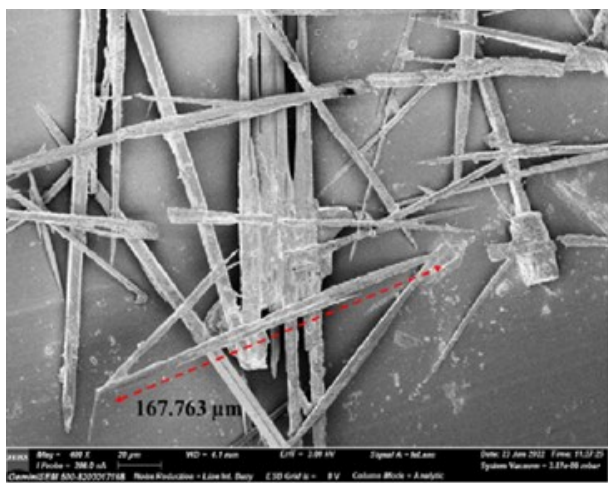

(i)

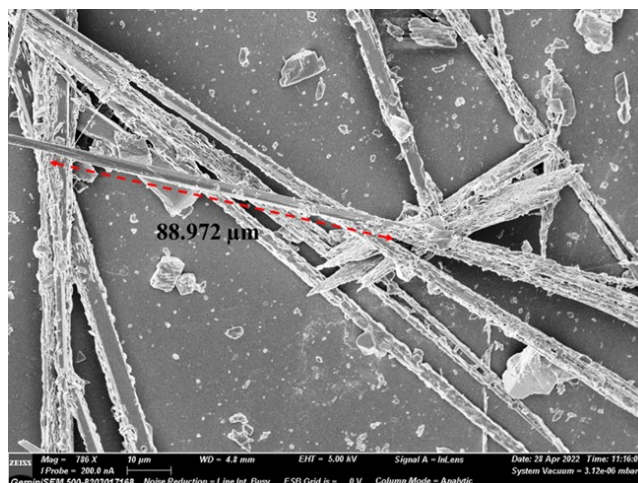

(ii)

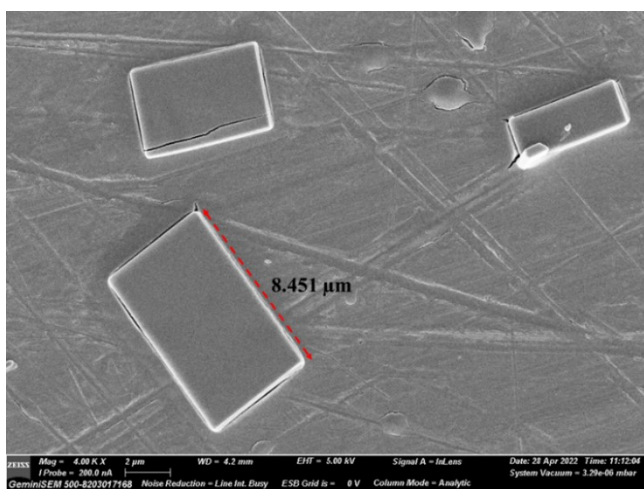

(iii)

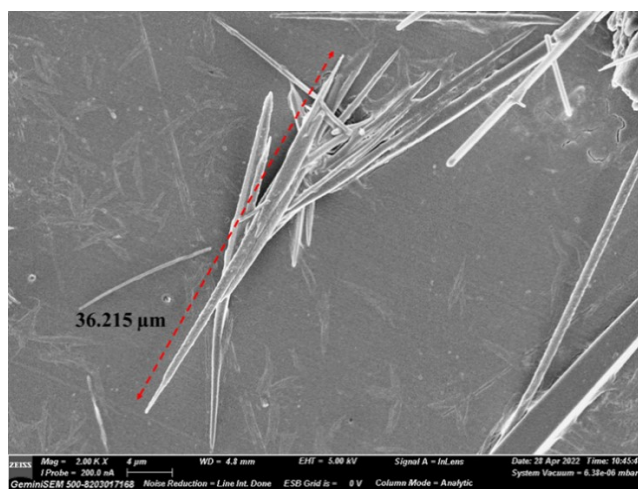

(iv)

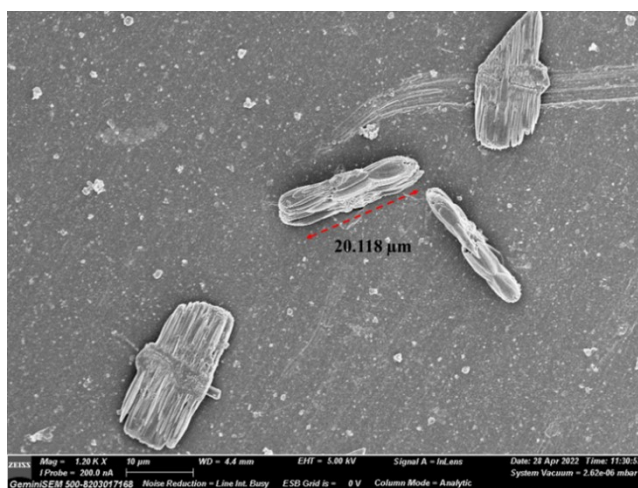

(v)

Figure S17: SEM images of (i) L-1 (ii) L-2 (iii)  $[\text{HL}]\text{NO}_3 \cdot \text{H}_2\text{O}$ ; (iv)  $[\text{HL}]\text{NO}_3 \cdot \text{L} \cdot \text{H}_2\text{O}$ ; (v)  $[\text{CdL}_3(\text{NO}_3)](\text{NO}_3) \cdot 2\text{L}$  complex.

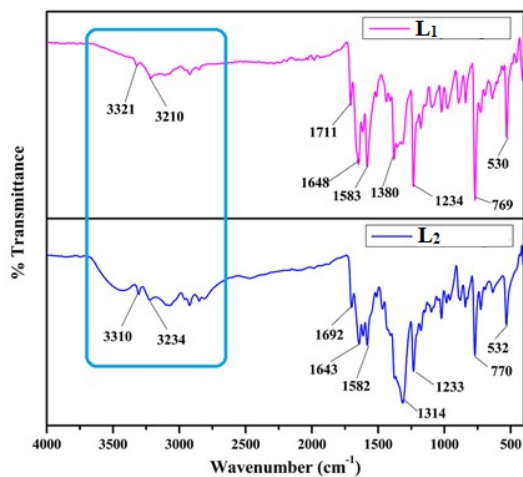

Figure S18: FT-IR spectra of the **L-1** (top) and **L-2** (bottom).

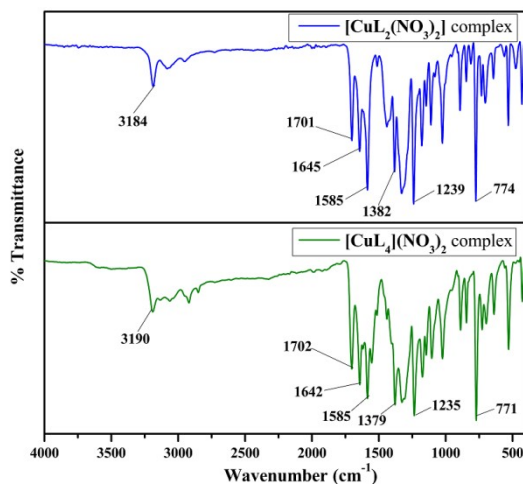

Figure S19: FT-IR spectra of the **[CuL<sub>2</sub>(NO<sub>3</sub>)<sub>2</sub>]** (top) and **[CuL<sub>4</sub>](NO<sub>3</sub>)<sub>2</sub>** (bottom) complex.

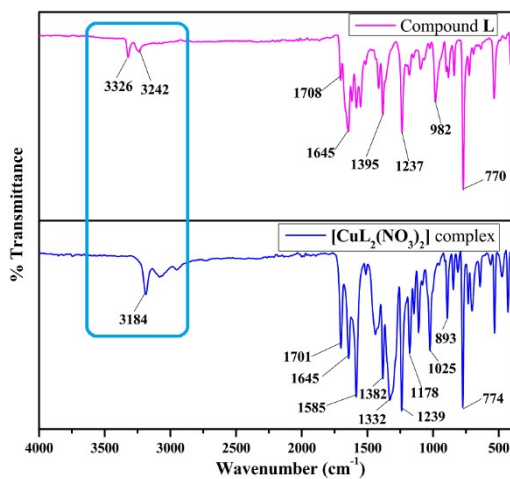

Figure S20: FT-IR spectra of the compound **L** and the **[CuL<sub>2</sub>(NO<sub>3</sub>)<sub>2</sub>]** complex.

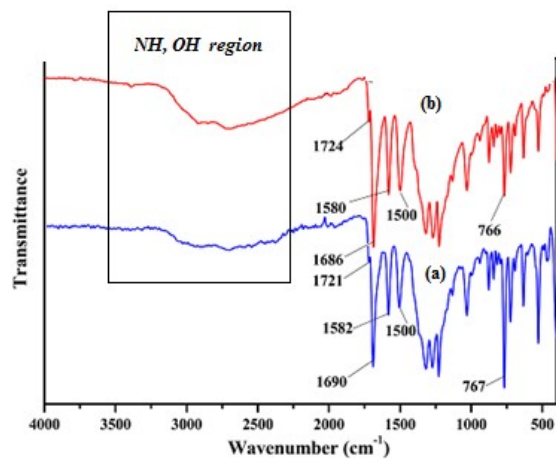

Figure S21: FT-IR spectra of (a)  $[\text{HL}]\text{NO}_3 \cdot \text{L} \cdot \text{H}_2\text{O}$  and (b) salt  $[\text{HL}]\text{NO}_3 \cdot \text{H}_2\text{O}$ .

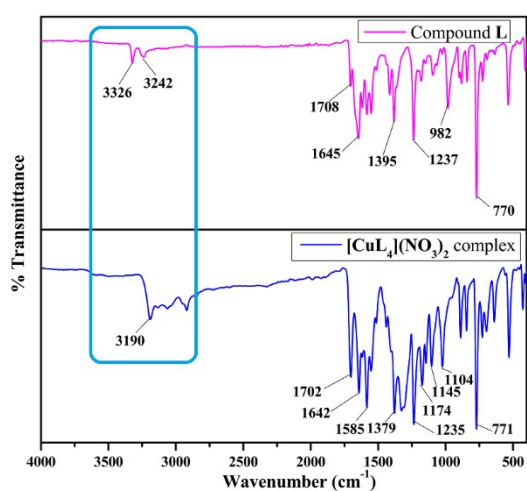

Figure S22: FT-IR spectra of the compound **L** (top) and  $[\text{CuL}_4](\text{NO}_3)_2$  (bottom) complex.

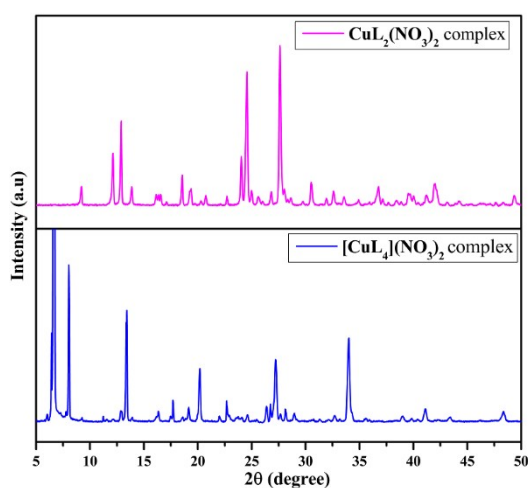

Figure S23: Experimental powder XRD patterns of the  $[\text{CuL}_2(\text{NO}_3)_2]$  (top) and  $[\text{CuL}_4](\text{NO}_3)_2$  (bottom) complex

|                             | Mean (mV)     | Area (%) | St Dev (mV) |
|-----------------------------|---------------|----------|-------------|
| Zeta Potential (mV): -4.74  | Peak 1: -4.74 | 100.0    | 3.47        |
| Zeta Deviation (mV): 3.47   | Peak 2: 0.00  | 0.0      | 0.00        |
| Conductivity (mS/cm): 0.376 | Peak 3: 0.00  | 0.0      | 0.00        |

Result quality : Good

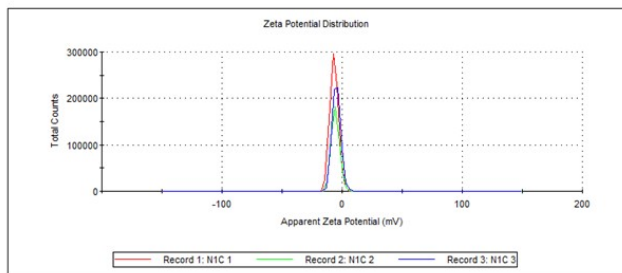

(i)

|                              | Mean (mV)     | Area (%) | St Dev (mV) |
|------------------------------|---------------|----------|-------------|
| Zeta Potential (mV): -4.79   | Peak 1: -5.52 | 98.9     | 6.68        |
| Zeta Deviation (mV): 9.58    | Peak 2: 61.1  | 1.1      | 0.576       |
| Conductivity (mS/cm): 0.0182 | Peak 3: 0.00  | 0.0      | 0.00        |

Result quality : Good

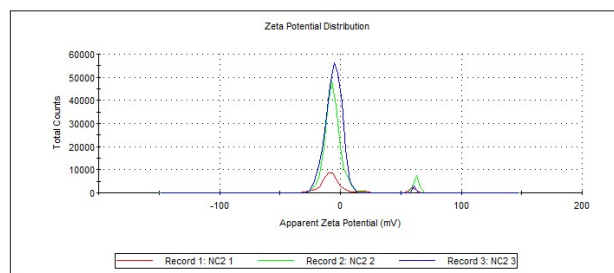

(ii)

|                              | Mean (mV)     | Area (%) | St Dev (mV) |
|------------------------------|---------------|----------|-------------|
| Zeta Potential (mV): -5.08   | Peak 1: -5.08 | 100.0    | 3.73        |
| Zeta Deviation (mV): 3.73    | Peak 2: 0.00  | 0.0      | 0.00        |
| Conductivity (mS/cm): 0.0978 | Peak 3: 0.00  | 0.0      | 0.00        |

Result quality : Good

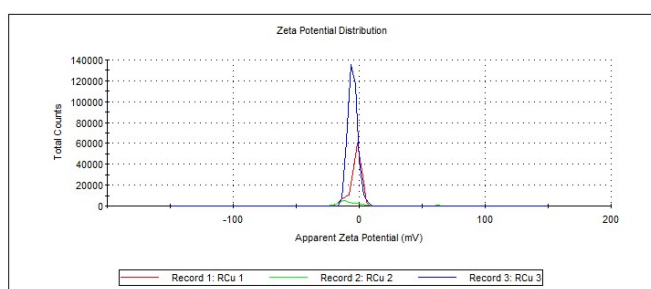

(iii)

|                              | Mean (mV)     | Area (%) | St Dev (mV) |
|------------------------------|---------------|----------|-------------|
| Zeta Potential (mV): -5.39   | Peak 1: -6.66 | 92.8     | 4.35        |
| Zeta Deviation (mV): 6.52    | Peak 2: 12.7  | 7.2      | 3.56        |
| Conductivity (mS/cm): 0.0315 | Peak 3: 0.00  | 0.0      | 0.00        |

Result quality : Good

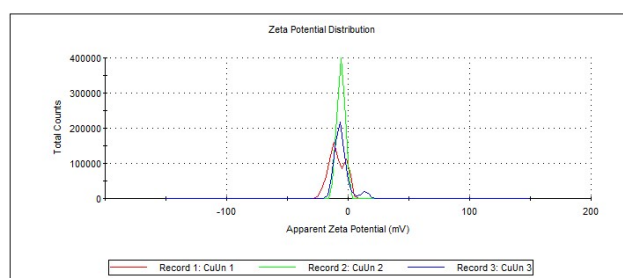

(iv)

|                              | Mean (mV)     | Area (%) | St Dev (mV) |
|------------------------------|---------------|----------|-------------|
| Zeta Potential (mV): -2.94   | Peak 1: -3.48 | 98.8     | 4.07        |
| Zeta Deviation (mV): 6.33    | Peak 2: 41.4  | 1.2      | 0.00        |
| Conductivity (mS/cm): 0.0726 | Peak 3: 0.00  | 0.0      | 0.00        |

Result quality : Good

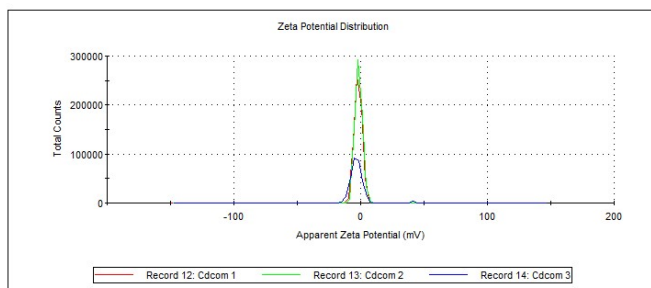

(v)

|                               | Mean (mV)     | Area (%) | St Dev (mV) |
|-------------------------------|---------------|----------|-------------|
| Zeta Potential (mV): -10.2    | Peak 1: -10.2 | 100.0    | 5.75        |
| Zeta Deviation (mV): 5.75     | Peak 2: 0.00  | 0.0      | 0.00        |
| Conductivity (mS/cm): 0.00685 | Peak 3: 0.00  | 0.0      | 0.00        |

Result quality : Good

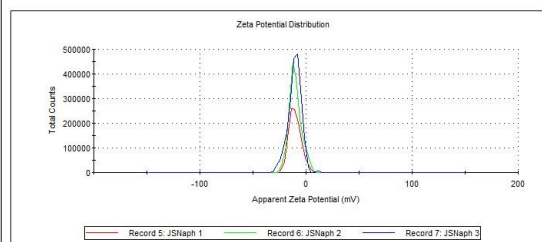

(vi)

Figure S24: Zeta-potential plots of aqueous solution of (i)  $[\text{HL}]\text{NO}_3 \cdot \text{H}_2\text{O}$  (1360  $\mu\text{M}$ ) salt; (ii)  $[\text{HL}]\text{NO}_3 \cdot \text{L} \cdot \text{H}_2\text{O}$  (330  $\mu\text{M}$ ) ionic co-crystal; (iii)  $[\text{CuL}_2(\text{NO}_3)_2]$  (540  $\mu\text{M}$ ) complex; (iv)  $[\text{CuL}_4(\text{NO}_3)_2]$  (225  $\mu\text{M}$ ) complex and (v)  $[\text{CdL}_3(\text{NO}_3)](\text{NO}_3) \cdot 2\text{L}$  (257  $\mu\text{M}$ ) complex. (vi) L (1 mM aqueous solution). In each case 0.5 ml were taken for the respective measurement.



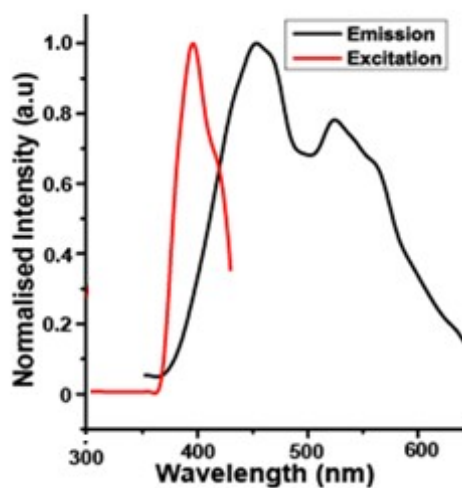

(a)

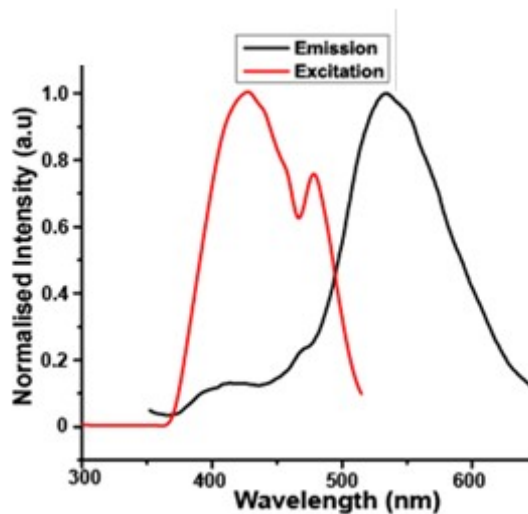

(d)

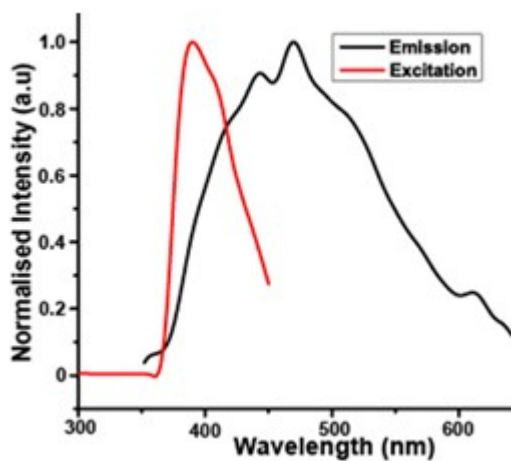

(b)

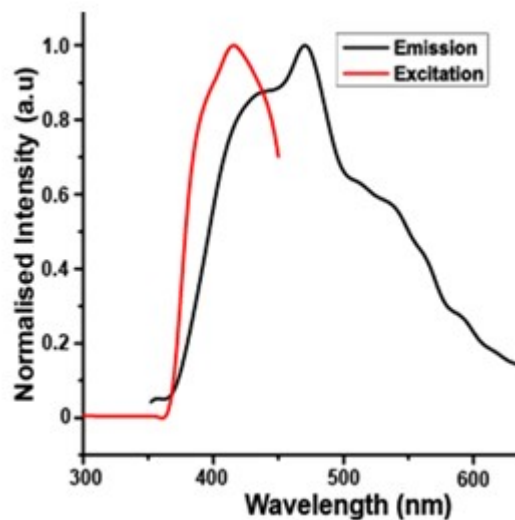

(c)

Figure S25: The excitation and emission spectra of (a) **L**; (b) **[LH]NO<sub>3</sub>.H<sub>2</sub>O** ; (c) **[LH]NO<sub>3</sub>.L.H<sub>2</sub>O** ; (d) **CdL<sub>3</sub>(NO<sub>3</sub>)](NO<sub>3</sub>).2L** (in each case 3 ml solution of 10 mM conc. In methanol,  $\lambda_{ex} = 388$  in each case).

Table 1S: Hydrogen bond parameters of polymorph, ionic-crystal and metal complexes.

| Compound                                             | H-bond                               | $d_{D-H}$ (Å) | $d_{H...A}$ (Å) | $d_{D...A}$ (Å) | $\angle DHA$ (°) |
|------------------------------------------------------|--------------------------------------|---------------|-----------------|-----------------|------------------|
| <b>L-2</b>                                           | N(2)-H(2A)···O(1) [1-x, 3-y, -z]     | 0.86(3)       | 2.31(3)         | 3.073(3)        | 148(2)           |
|                                                      | N(2)-H(2B)···O(3) [x, 1+y, z]        | 1.00(4)       | 2.35(4)         | 3.183(3)        | 141(3)           |
|                                                      | N(4)-H(4A)···O(2) [x, -1+y, z]       | 0.89(3)       | 2.27(3)         | 3.144(3)        | 165(2)           |
|                                                      | N(4)-H(4B)···O(4) [1-x, -y, 1-z]     | 0.90(3)       | 2.21(3)         | 3.038(3)        | 154(2)           |
| <b>[HL]NO<sub>3</sub>·H<sub>2</sub>O</b>             | N(2)-H(2B)···O(6) [x, y, 1+z]        | 0.86          | 1.83            | 2.691(3)        | 171              |
|                                                      | N(2)-H(2C)···O(5) [x, y, 1+z]        | 0.99          | 1.76            | 2.745(3)        | 174              |
|                                                      | O(6)-H(6A)···O(3) [x, y, z]          | 0.85          | 2.47            | 3.159(3)        | 139              |
|                                                      | O(6)-H(6A)···O(5) [x, y, z]          | 0.85          | 2.04            | 2.867(3)        | 164              |
|                                                      | O(6)-H(6B)···O(2) [-x 1-y, 1-z.]     | 0.85          | 2.12            | 2.957(3)        | 171              |
| <b>[HL]NO<sub>3</sub>L·H<sub>2</sub>O</b>            | N(2)-H(2A)···O(8) [-1+x, y, -1+z]    | 0.87          | 1.86            | 2.726(4)        | 175              |
|                                                      | N(2)-H(2B)···N(5) [x, y, -1+z]       | 0.87          | 2.12            | 2.890(3)        | 148              |
|                                                      | N(2)-H(2C)···O(4) [1-x, ½+y, -z]     | 1.04(5)       | 1.93(5)         | 2.847(5)        | 147(4)           |
|                                                      | O(8)-H(8A)···O(7) [1-x, -1/2+y, 1-z] | 0.85          | 2.00            | 2.836(4)        | 166              |
|                                                      | O(8)-H(8B)···O(4) [1-x, ½+y, 1-z]    | 0.85          | 2.13            | 2.915(4)        | 153              |
|                                                      | O(8)-H(8B)···O(5) [1-x, ½+y, 1-z]    | 0.85          | 2.32            | 3.056(5)        | 145              |
| <b>[CuL<sub>4</sub>](NO<sub>3</sub>)<sub>2</sub></b> | N(2)-H(2A)···O(4) [1+x, y, z]        | 0.89          | 2.40            | 3.050(4)        | 130              |
|                                                      | N(2)-H(2B)···O(5) [1-x, 1-y, 1-z]    | 0.89          | 1.99            | 2.873(5)        | 171              |
|                                                      | N(4)-H(4A)···O(1) [-1+x, y, z]       | 0.89          | 2.10            | 2.994(4)        | 176              |
|                                                      | N(4)-H(4B)···O(5) [1-x, 1-y, 1-z]    | 0.89          | 2.20            | 2.935(6)        | 139              |
